# Supplementary material
Source: publisher site journal article supplement (https://www.dovepress.com/article/484534)
Supplement: Supplementary file 1 [file get_supplementary_file.php]

**Supplementary tables**

**Supplementary table 1. frequency and percentages of participants ‘responses to knowledge questions:**

| **Question number** | **Knowledge items** | ***I don't know***  ***n (%)*** | ***False***  ***n (%)*** | ***correct***  ***n (%)*** |
| --- | --- | --- | --- | --- |
|  | **Knowledge on cervical cancer** | | | |
| (Q1) | HPV is the main cause for all types of cervical cancer | 20 (16%) | 40 (31%) | 68 (53%) |
| (Q2) | Symptoms of cervical cancer include pain during intercourse and vaginal bleeding after intercourse | 18 (14%) | 4 (3.1%) | 106 (83%) |
| (Q3) | a cervical swab diagnoses cervical cancer | 5 (3.9%) | 13 (10%) | 110 (86%) |
| (Q4) | When diagnosed early enough, cervical cancer is treatable and curable | 15 (12%) | 6 (4.7%) | 107 (84%) |
| (Q5) | There are five stages for the progression of cervical cancer | 31 (24%) | 5 (3.9%) | 92 (72%) |
|  | **Knowledge on HPV** | | | |
| (Q1) | HPV infection has obvious symptoms in the female genital system | 18 (14%) | 45 (35%) | 65 (51%) |
| (Q2) | There is a PCR test for HPV | 24 (19%) | 7 (5.5%) | 97 (76%) |
| (Q3) | There is currently a treatment to cure HPV infection | 42 (33%) | 37 (29%) | 49 (38%) |
| (Q4) | Sexual contact is the main mode of HPV transmission | 20 (16%) | 11 (8.6%) | 97 (76%) |
| (Q5) | Men, like women can get infected with HPV | 25 (20%) | 17 (13%) | 86 (67%) |
| (Q6) | There are different strains of HPV | 26 (20%) | 4 (3.1%) | 98 (77%) |
|  | **Knowledge on HPV vaccine** | | | |
| (Q1) | Getting vaccinated with the HPV vaccine is recommended by the Saudi MOH | 22 (17%) | 2 (1.6%) | 104 (81%) |
| (Q2) | HPV vaccine must be given to girls aged 9 to 13 years old | 24 (19%) | 7 (5.5%) | 97 (76%) |
| (Q3) | HPV vaccine prevents 70% of cervical cancer cases | 29 (23%) | 3 (2.3%) | 96 (75%) |
| (Q4) | HPV vaccine is given in two doses separated by 6-12 months | 34 (27%) | 2 (1.6%) | 92 (72%) |
| (Q5) | HPV is given intramuscularly | 40 (31%) | 5 (3.9%) | 83 (65%) |
|  | **Total knowledge score** | **38.5 (23, 47)** | | |

**Supplementary table 2. Frequency and percentages of participants ‘responses to attitude questions:**

| **Question number** | **Attitude items** | **Strongly agree**  **n (%)** | **Agree**  **n (%)** | **Not sure**  **n (%)** | **Disagree**  **n (%)** | **Strongly disagree**  **n (%)** |
| --- | --- | --- | --- | --- | --- | --- |
| (Q1) | I think that the HPV vaccine is effective | 73 (57%) | 39 (30%) | 16 (13%) | 0 (0%) | 0 (0%) |
| (Q2) | I think that the HPV vaccine is safe | 71 (55%) | 35 (27%) | 21 (16%) | 1 (0.8%) | 0 (0%) |
| (Q3) | I must encourage my students/daughters to take the HPV vaccine | 16 (13%) | 7 (5.5%) | 13 (10%) | 54 (42%) | 38 (30%) |
| (Q4) | Awareness campaigns about the importance of HPV vaccine will encourage its administration | 82 (64%) | 31 (24%) | 14 (11%) | 1 (0.8%) | 0 (0%) |
| (Q5) | Girls' must be enabled to take HPV vaccine without their parents' permission | 89 (70%) | 29 (23%) | 9 (7.0%) | 1 (0.8%) | 0 (0%) |
| (Q6) | "Sexual education" must be included in educational curricula | 57 (45%) | 22 (17%) | 33 (26%) | 11 (8.6%) | 5 (3.9%) |
| (Q7) | Religious jurisdiction has a great effect on encouraging vaccination with HPV vaccine | 49 (38%) | 38 (30%) | 26 (20%) | 8 (6.3%) | 7 (5.5%) |
| (Q8) | Medical recommendations from experts have a great effect on encouraging vaccination with HPV vaccine | 57 (45%) | 36 (28%) | 26 (20%) | 5 (3.9%) | 4 (3.1%) |
| (Q9) | My experience with COVID-19 vaccine encourages me to advocate for vaccination with the HPV vaccine | 72 (56%) | 35 (27%) | 16 (13%) | 5 (3.9%) | 0 (0%) |
| (Q10) | I recommend getting vaccinated with HPV vaccine to obtain essential protection against cervical cancer | 38 (30%) | 43 (34%) | 33 (26%) | 11 (8.6%) | 3 (2.3%) |
| (Q11) | My recommendation in favor of getting HPV vaccine does not necessarily mean that I agree to give it to my family | 71 (55%) | 42 (33%) | 15 (12%) | 0 (0%) | 0 (0%) |
| (Q12) | I will not recommend the HPV vaccine if it religious scholars advised against it | 31 (24%) | 30 (23%) | 23 (18%) | 29 (23%) | 15 (12%) |
| (Q13) | I will not recommend HPV vaccine if it has adverse effects | 22 (17%) | 15 (12%) | 37 (29%) | 29 (23%) | 25 (20%) |
| (Q14) | I will not recommend the HPV vaccine if it becomes clear that it will lead to Community disintegration and introduction of concepts of sexual liberation | 24 (19%) | 31 (24%) | 40 (31%) | 21 (16%) | 12 (9.4%) |
| (Q15) | I must avoid talking about sexual education with my students/daughters | 27 (21%) | 22 (17%) | 31 (24%) | 21 (16%) | 27 (21%) |
|  | **Total attitude score** | **56 (52, 61)** | | | | |

**Supplementary Questionnaire**

**Section 1 of 4**
**Physicians' Survey on the Human Papillomavirus (HPV) Vaccine, a Cause of Cervical Cancer**

While completing this survey, you will encounter three different concepts: virus, cancer, and vaccine. It is important to distinguish between them, and you will see them referred to as follows:

1. HPV virus.
2. Cervical cancer.
3. The vaccine against the virus.

Your responses will help us measure physicians' knowledge in Saudi Arabia, especially following the inclusion of the HPV vaccine in the immunization schedule for girls aged 11 and 12.

Participation in this survey will take approximately 5 minutes.

**I consent to participate voluntarily, with confidentiality assured and the option to withdraw at any time?**Yes, I consent.
No, leave the survey.

**Section 2 of 4**
**General Information**

**Gender:**
(1) Male
(0) Female

**Your birth year (Gregorian):**

**I work in the healthcare sector:**
(1) Public/Government
(0) Private

**My medical specialty:**
(1) Family Medicine
(2) Internal Medicine
(3) Obstetrics and Gynecology
(4) Infectious Diseases
(5) Other

**Years of experience:**

**Educational level:**
(1) Internship
(2) Resident Physician
(3) Fellowship
(4) Consultant (Assistant, Associate, Consultant)

**I read published research in medical journals regularly:**
(4) Yes, to a great extent
(3) Yes, to a moderate extent
(2) Yes, to a limited extent
(0) I do not read at all

**Marital status:**
(1) Single
(2) Married
(3) Other

**Number of children:**
(0) 0
(1) 1
(2) 2
(3) 3
(4) 4 or more
(1-) Not applicable

**Number of female children:**
(0) 0
(1) 1
(2) 2
(3) 3
(4) 4 or more
(1-) Not applicable

**Number of female children aged 10-18 years:**
(0) 0
(1) 1
(2) 2
(3) 3
(4) 4 or more
(1-) Not applicable

**I have been diagnosed with cervical cancer:**
(0) No
(1) Yes
(1-) Not applicable

**I know or have heard of a woman or girl diagnosed with cervical cancer:**
(0) No
(1) Yes

**I learned about the cervical cancer vaccine through:** (Select all that apply)
(0) No
(1) Yes

1. Awareness from within my institution
2. During my time at university
3. Media (TV, radio, print)
4. Reading research/attending conferences
5. Friends/Acquaintances/Family
6. I have never heard of this subject before

**Section 3 of 4**
**Measuring Your Knowledge About Cervical Cancer, HPV, and the Vaccine**

**Knowledge about cervical cancer**
(2) Correct
(1) Incorrect
(0) I don’t know

1. The primary cause of all types of cervical cancer is the HPV virus.
2. Symptoms of cervical cancer include vaginal bleeding after intercourse, between menstrual cycles, and pain during intercourse.
3. Cervical cancer is diagnosed through a Pap Smear test.
4. Cervical cancer can be treated and completely cured if detected early.
5. There are five stages of cancer progression, starting from the pre-cancerous stage to an incurable condition.

**Knowledge about the HPV virus**
(2) Correct
(1) Incorrect
(0) I don’t know

1. HPV infection has clear symptoms in the female reproductive system.
2. There is a specific PCR test to detect HPV.
3. There is currently a treatment to eliminate HPV.
4. The main mode of transmission for HPV is sexual contact.
5. Men can contract HPV just like women.
6. The two HPV strains most associated with cervical cancer are HPV-16 and HPV-18.

**Knowledge about the HPV vaccine**
(2) Correct
(1) Incorrect
(0) I don’t know

1. The Saudi Ministry of Health recommends the HPV vaccine.
2. The HPV vaccine is given to girls aged 9 to 13 years.
3. The HPV vaccine prevents 70% of cervical cancer cases.
4. The HPV vaccine is administered in two doses, 6-12 months apart.
5. The HPV vaccine is given via intramuscular injection.

**Section 4 of 4**
**Measuring Physicians' Opinions and Decisions About the Vaccine**

To what extent do you agree with the following statements?

(5) Strongly agree
(4) Agree
(3) Not sure
(2) Disagree
(1) Strongly disagree

1. I believe the HPV vaccine is effective.
2. I believe the HPV vaccine is safe.
3. I should avoid discussing sexually transmitted diseases with my patients.
4. I should encourage my female patients to receive the vaccine.
5. Awareness campaigns about the importance of the HPV vaccine will encourage vaccination.
6. Girls should be allowed to receive the HPV vaccine without parental consent.
7. A "sexual education" course should be included in school curricula.
8. Religious fatwas play a significant role in encouraging vaccination.
9. Medical recommendations from experts greatly influence vaccination encouragement.

**As a physician, how will the following factors influence you to encourage your patients to receive the HPV vaccine?**
(5) Very positive impact
(4) Positive impact
(3) No impact
(2) Negative impact
(1) Very negative impact

1. Recommendations from other physicians will influence me.
2. Advice from relatives and friends will influence me.
3. My readings about HPV and its vaccine will influence me.
4. Information that HPV is not a global pandemic will influence me.
5. Information that HPV transmission is mostly linked to sexual activity will influence me.
6. Information that the HPV vaccine is not mandatory will influence me.
7. Government directives on receiving the vaccine will influence me.
8. My personal beliefs about vaccines will influence me.
9. The likelihood of my patients contracting HPV will influence me.
10. The likelihood of my patients developing cervical cancer will influence me.
11. The potential side effects of vaccines will influence me.
12. The potential spread of cervical cancer will influence me.
13. The availability of a free HPV vaccine will influence me.

To what extent do you agree with the following statements?
(5) Strongly agree
(4) Agree
(3) Not sure
(2) Disagree
(1) Strongly disagree

1. My experience with the COVID-19 vaccine encourages me to promote the HPV vaccine.
2. I recommend the HPV vaccine for protection against cervical cancer.
3. Recommending the HPV vaccine to my patients does not necessarily mean I would give it to my family.
4. I will not promote the HPV vaccine if religious scholars oppose it.
5. I will not promote the HPV vaccine if it is found to have side effects.
6. I will not promote the HPV vaccine if it leads to societal degradation and the spread of sexual freedom.

Finally, we thank you for your cooperation and offer you this space to provide any comments you would like to share about the survey.
